# Supplementary material
Source: PubMed Central journal article supplement (PMC2878089)
Supplement: supp_M109.053850_jbc.M109.053850-3.pdf [file supp_M109.053850_jbc.M109.053850-3.pdf]

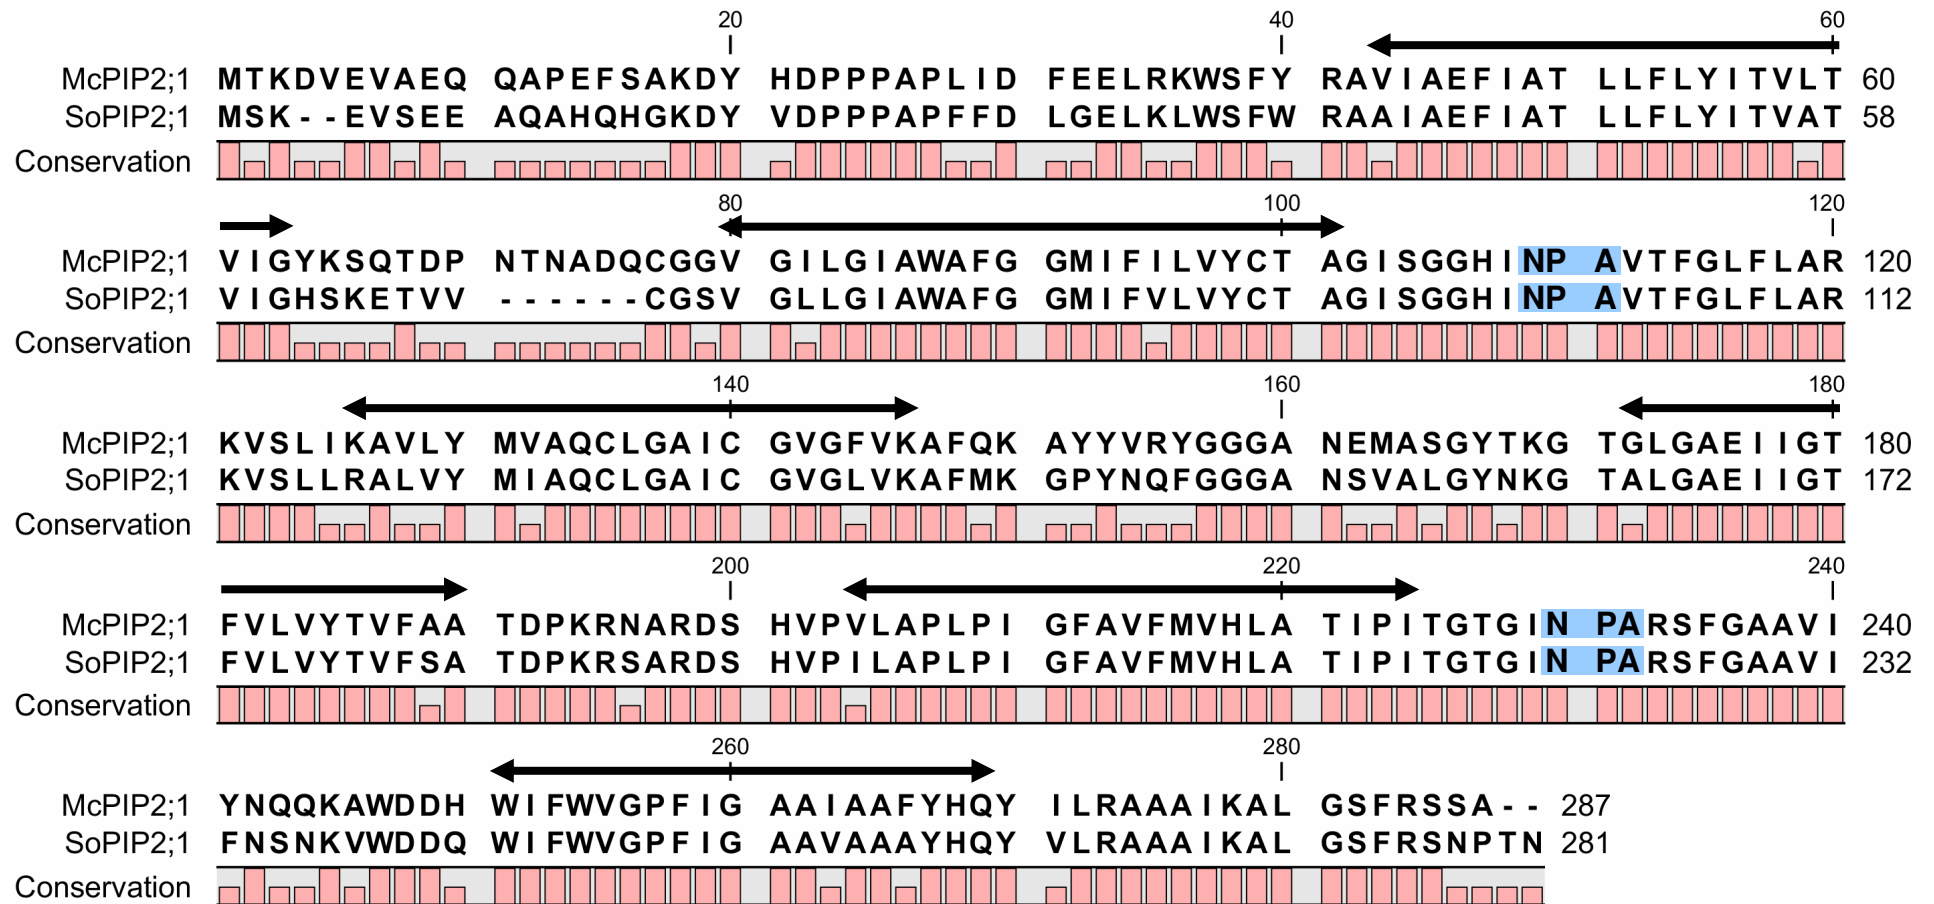

Supplemental Figure S2. Full length sequence alignment of *McPIP2;1* and *SoPIP2;1*. Putative transmembrane domains are marked by double arrows above the sequences. The signature motifs (NPA) for aquaporins are shown in pale blue background. Amino acid residues identity between *McPIP2;1* and *SoPIP2;1* is shown as a conservation bar graph below the sequences. Sequence alignment was done by using CLC Sequence Viewer application.
